# Supplementary figures and images for: Pleomorphic Variants of Borreliella (syn. Borrelia) burgdorferi Express Evolutionary Distinct Transcriptomes
Source: MDPI journal article supplement (doi:10.3390/ijms24065594), 2023-03-15

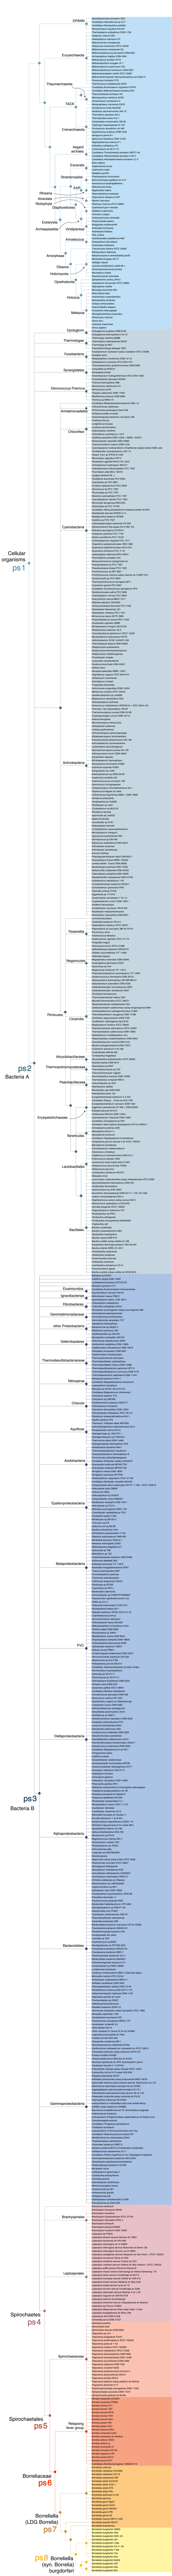

Supplement: s1 [file s1]
